# Supplementary material for: Sunflower pollen-derived microcapsules adsorb light and bacteria for enhanced antimicrobial photothermal therapy
Source: Royal Society of Chemistry journal article supplement (doi:10.1039/d3nr04814d), 2024-01-01
Supplement: d3nr04814d1.pdf [file d3nr04814d1.pdf]

ARTICLE

## Sunflower pollen-derived microcapsules adsorb light and bacteria for enhanced antimicrobial photothermal therapy

Received 00th January 20xx,  
Accepted 00th January 20xx

DOI: 10.1039/x0xx00000x

Yao Yang,<sup>‡a</sup> Bin Wang,<sup>‡ab</sup> Qian Liu,<sup>c</sup> Zhenghua Wei,<sup>ab</sup> Ziyi Mou,<sup>d</sup> Quan Li,<sup>ad</sup> Chunfa Chen,<sup>ab</sup> Zaichun You,<sup>d</sup> Bang Lin Li,<sup>e</sup> Guansong Wang,<sup>\*ab</sup> Zhi Xu,<sup>\*abf</sup> Hang Qian<sup>\*abf</sup>

### Supplementary Material

**Table S1** Elemental analysis of SEC and H-SECs.

|       | C %       | H %       | S %       | N %       |
|-------|-----------|-----------|-----------|-----------|
| SECs  | 54.7±0.02 | 7.39±0.02 | 1.29±0.21 | 0.87±0.02 |
| HSECs | 56.3±0.10 | 7.19±0.01 | 3.35±0.01 | 2.58±0.02 |

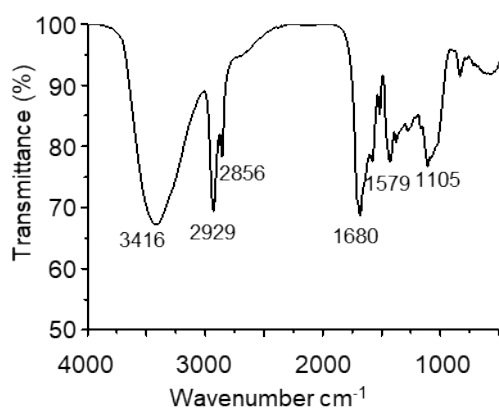

**Fig. S1** FTIR spectrum of SECs.

<sup>a</sup> Institute of Respiratory Diseases, Xinqiao Hospital, Third Military Medical University, 183 Xinqiao Street, Chongqing 400037, China. E-mail: hqian@tmmu.edu.cn, wanggs2003@163.com, xu\_zhi999@163.com.

<sup>b</sup> Chongqing Key Laboratory of Precision Medicine and Prevention of Major Respiratory Diseases, Chongqing 400037, China

<sup>c</sup> Laboratory of Pharmacy and Chemistry, and Laboratory of Tissue and Cell Biology, Lab Teaching & Management Center, Chongqing Medical University, Chongqing 400016, China.

<sup>d</sup> Department of General Practice, Xinqiao Hospital, Third Military Medical University, Chongqing, 400037 (China)

<sup>e</sup> School of Chemistry and Chemical Engineering, Southwest University, Chongqing 400715, China.

<sup>f</sup> Yu-Yue Pathology Scientific Research Center, Chongqing, China

† Footnotes relating to the title and/or authors should appear here.

Electronic Supplementary Information (ESI) available: [details of any supplementary information available should be included here]. See DOI: 10.1039/x0xx00000x

‡ These authors contributed equally to this manuscript

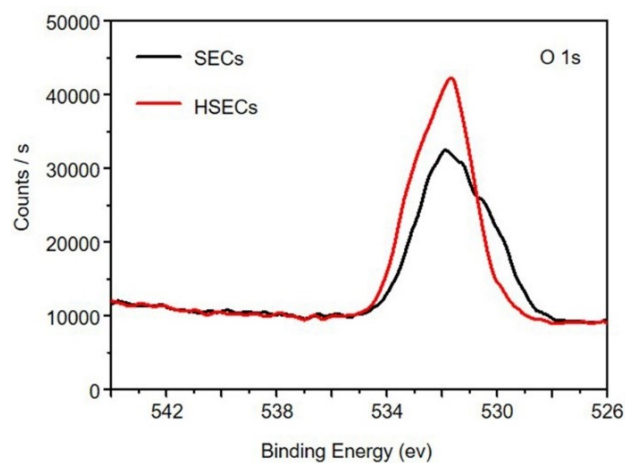

Fig. S2 High resolution XPS spectrum of O 1s.

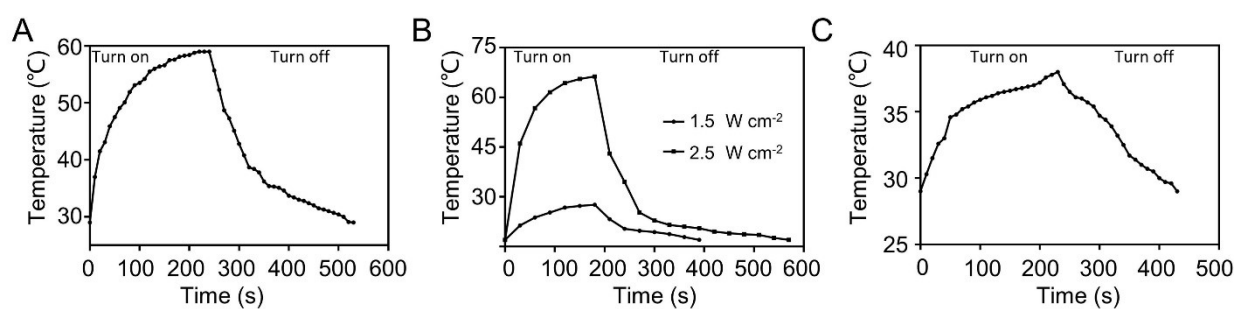

Fig. S3 (A) Photothermal effects of HSECs at 2.0 W cm<sup>-2</sup> (B) Photothermal effects of HSECs at 1.5 W cm<sup>-2</sup> and 2.5 W cm<sup>-2</sup>. (C) Photothermal effects of SECs at 2.0 W cm<sup>-2</sup>.

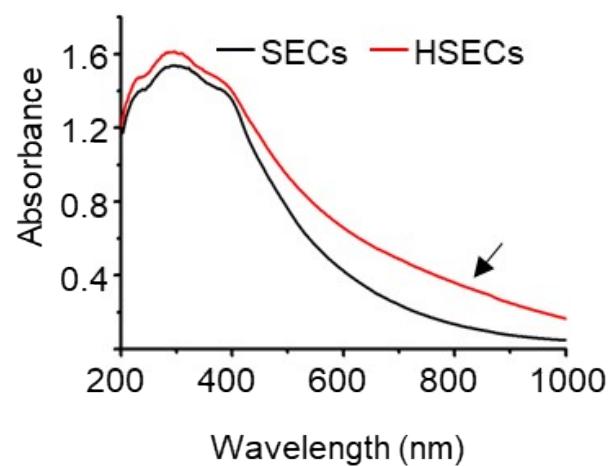

Fig. S4 UV-Vis-NIR spectrum of SECs and HSECs.

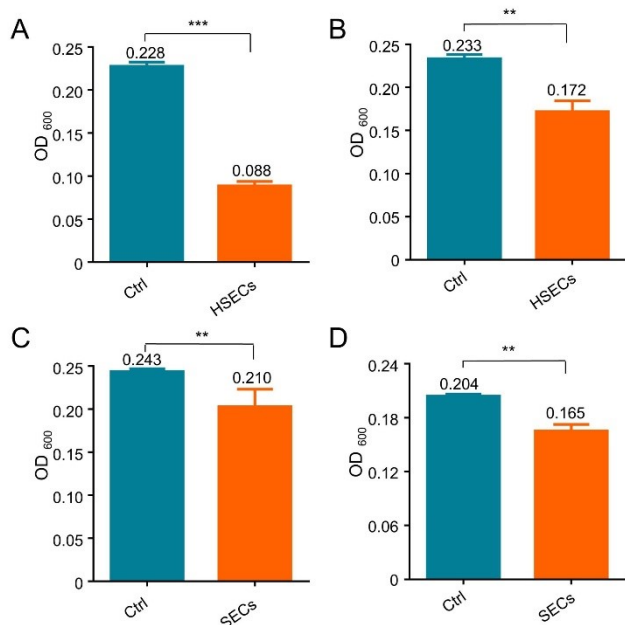

**Fig. S5** (A) The OD<sub>600</sub> of the supernatant of HSECs and *S. aureus* mixture solution. (B) The OD<sub>600</sub> of the supernatant of HSECs and *E. coli* mixture solution. (C) The OD<sub>600</sub> of the supernatant of SECs and *S. aureus* mixture solution. (D) The OD<sub>600</sub> of the supernatant of SECs and *E. coli* mixture solution (t-test, n=4, \*\*P < 0.01, \*\*\*P < 0.001).

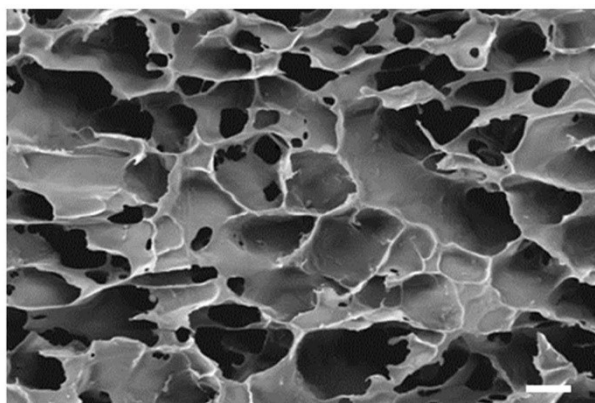

**Fig. S6** SEM images of HSECs@Curdlan. Scale bar: 5 μm

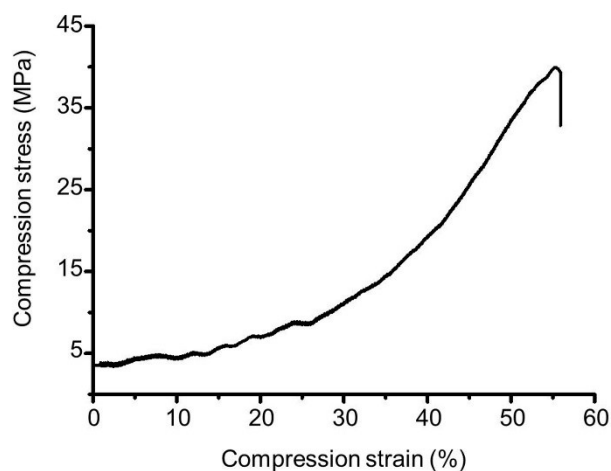

**Fig. S7** compression strain-stress curves of HSECs@Curdlan.

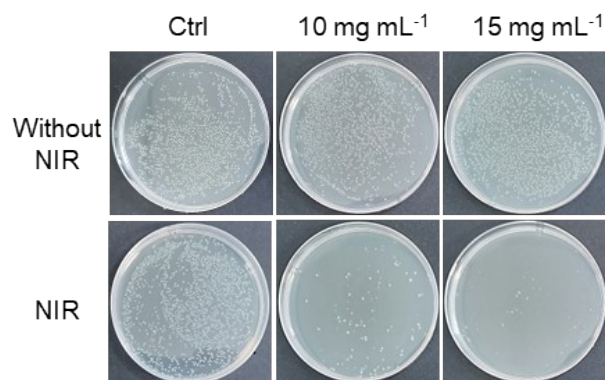

**Fig. S8** NIR light-driven antibacterial effects of HSECs@Curdlan against *E. coli*. Representative Photographs of *E. coli*. colony plates after being treated with HSECs@Curdlan containing different concentrations of HSECs.

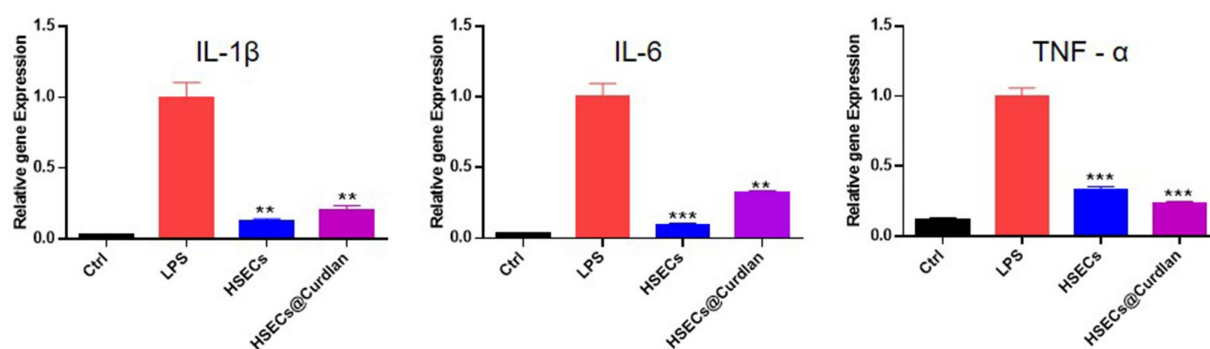

**Fig. S9** Relative gene expression of interleukin-1β (IL-1β), TNF-α, interleukin-6 (IL-6). The LPS group was set as positive control compared to the LPS group (t-test, n=3, \*P < 0.05, \*\*P < 0.01, \*\*\*P < 0.001).

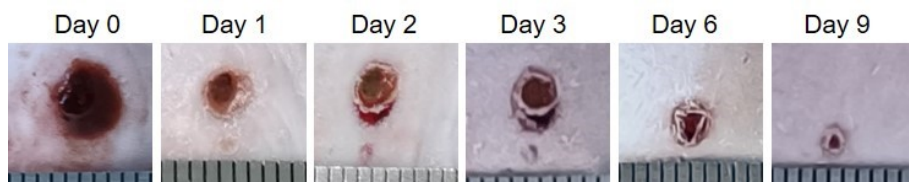

**Fig. S10** The HSECs@Curdlan hydrogel in wound beds from day 0 to day 9.

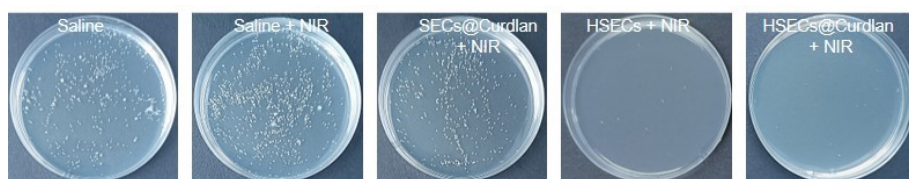

**Fig. S11** Representative Photographs of *S. aureus* colony plates of different groups.

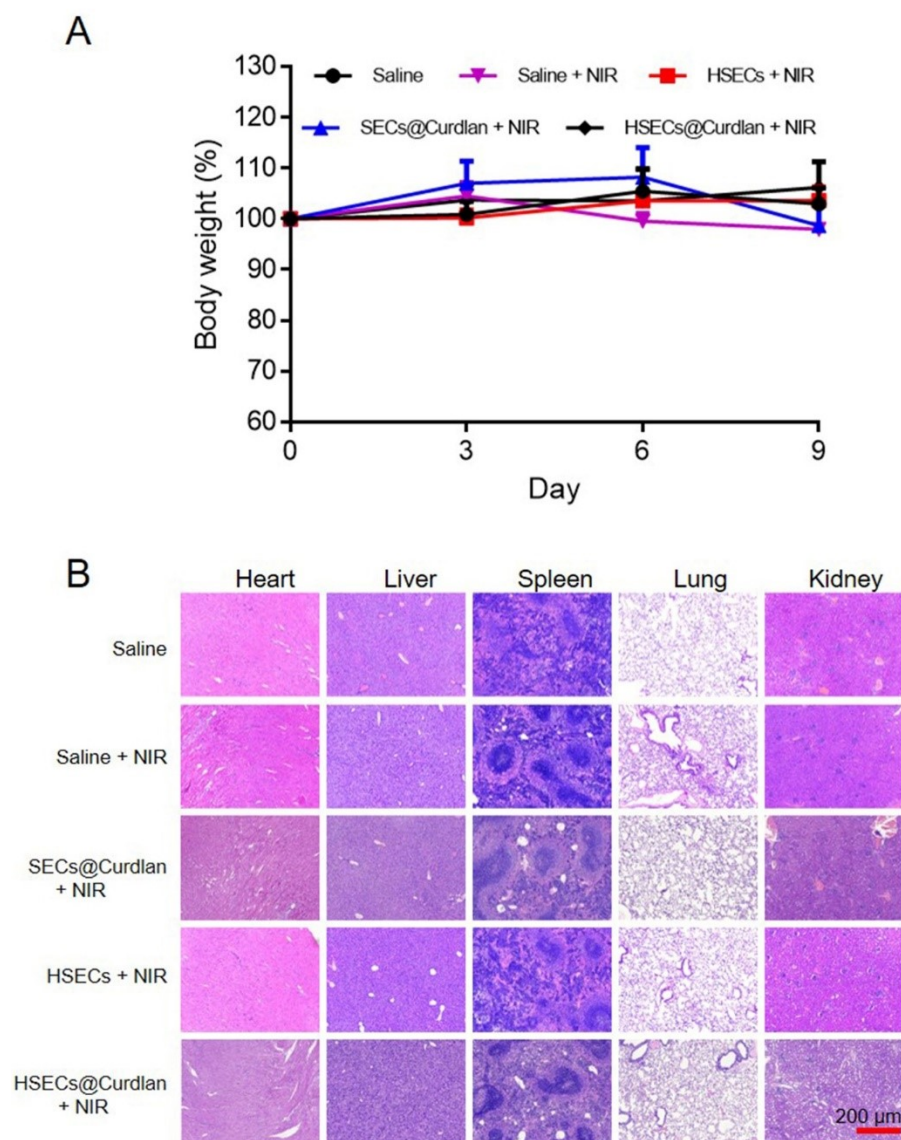

**Fig. S12** (A) Body weight change curves of each group at day 0, 3, 6, 9 (n=3). (B) H. E. staining of heart, liver, spleen, lung, kidney of different groups at day 9.

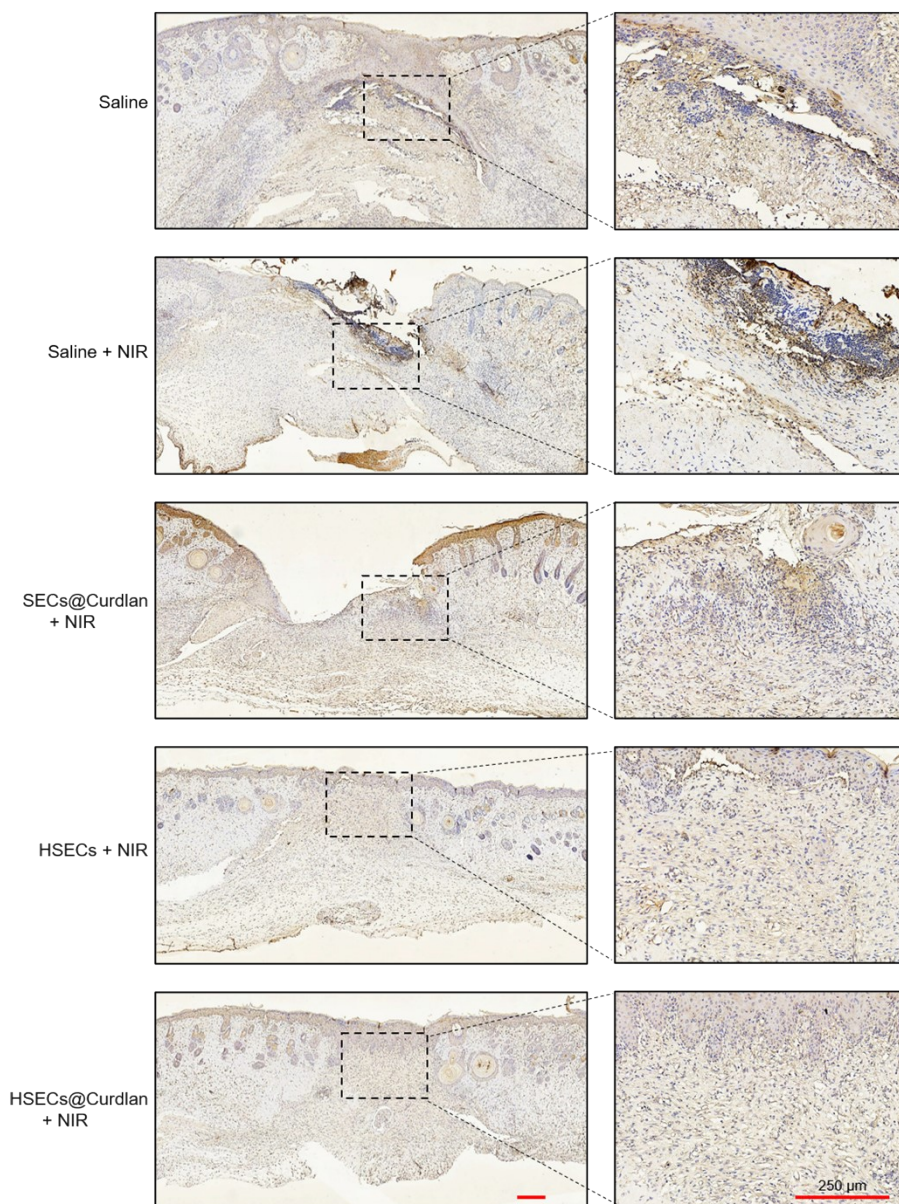

**Fig. S13** Immunohistochemical images of IL-6 of different groups on day 9, the scale bar is 250 µm.
